## Suppression of Central Nervous System Sodium Channels by Propofol

Benno Rehberg, M.D.,\* Daniel S. Duch, Ph.D.†

**Background:** Previous studies have provided evidence that clinical levels of propofol alter the functions of voltage-dependent sodium channels, thereby inhibiting synaptic release of glutamate. However, most of these experiments were conducted in the presence of sodium-channel activators, which alter channel inactivation. This study electrophysiologically characterized the interactions of propofol with unmodified sodium channels.

**Methods:** Sodium currents were measured using whole-cell patch-clamp recordings of rat brain IIa sodium channels expressed in a stably transfected Chinese hamster ovary cell line. Standard electrophysiologic protocols were used to record sodium currents in the presence or absence of externally applied propofol.

**Results:** Propofol, at concentrations achieved clinically in the brain, significantly altered sodium channel currents by two mechanisms: a voltage-independent block of peak currents and a concentration-dependent shift in steady-state inactivation to hyperpolarized potentials, leading to a voltage dependence of current suppression. The two effects combined to give an apparent concentration yielding a half-maximal inhibitory effect of 10  $\mu\text{M}$  near the threshold potential of action potential firing (about  $-60$  mV). Propofol inhibition was also use-dependent, causing a further block of sodium currents at these anesthetic concentrations.

**Conclusions:** In these experiments with pharmacologically unaltered sodium channels, propofol inhibition of currents occurred at concentrations about eight-fold above clinical plasma levels and thus at brain concentrations reached during clinical anesthesia. Therefore, the results indicate a possible role for sodium-channel suppression in propofol anesthesia.

\* Research Fellow, Department of Anesthesiology. Current position: Staff Anesthesiologist, Department of Anesthesiology, University of Bonn, Bonn, Germany.

† Assistant Professor of Anesthesiology and Physiology.

Received from the Department of Anesthesiology, Cornell University Medical College, New York, New York. Submitted for publication August 17, 1998. Accepted for publication April 12, 1999. Supported by grant no. GM-41102 from the National Institutes of Health, Bethesda, Maryland (to Dr. Duch). Presented in part at the European Society of Anaesthesiologists Annual Congress, Paris, France, April 29–May 3, 1995.

Address reprint requests to Dr. Rehberg: Klinik und Poliklinik fuer Anaesthesiologie und spezielle Intensivmedizin, Medizinische Einrichtungen der Universitaet Bonn, Sigmund-Freud-Str. 25, D-53105 Bonn, Germany. Address electronic mail to: umc807@ibm.rhrz.uni-bonn.de

(Key words: Anesthetic mechanisms; anesthetic-protein interaction; brain.)

THE molecular mechanisms of action of the widely used anesthetic agent propofol (2,6-diisopropylphenol) are not completely understood. Most research has focused on enhanced  $\gamma$ -aminobutyric acid (GABA)-mediated synaptic inhibition.<sup>1-5</sup> However, a recent study with selectively bred mice found no difference in sensitivity of GABA<sub>A</sub> receptors in two distinct breeds of mice, despite differences in their clinical sensitivity to propofol.<sup>6</sup> These results suggest that additional mechanisms of propofol action besides the GABA<sub>A</sub> receptor may exist.

In addition to the effects of propofol on GABA<sub>A</sub>-activated chloride channels, propofol has been shown to have several molecular actions on various receptors.<sup>7-11</sup> Recent evidence points to additional presynaptic mechanisms, including modification of voltage-dependent sodium,<sup>12,13</sup> potassium,<sup>14</sup> and calcium channels.<sup>15</sup> For example, propofol has been found to inhibit glutamate release primarily by blocking current through sodium channels.<sup>13</sup> However, the mechanism of this sodium current suppression needs to be further elucidated.

Previous electrophysiologic studies on propofol suppression of neuronal sodium currents have used synaptosomal preparations with toxin-treated sodium channels having altered channel inactivation.<sup>12</sup> Examination of propofol interactions with sodium channels using ion-flux measurements and toxin-binding studies, however, indicated that propofol suppressed glutamate release by blocking sodium currents both in the presence and absence of these activators.<sup>13,16</sup> These studies also indicated that propofol interacts, either specifically or allosterically, with the binding sites of the toxins used in the previous studies.<sup>16</sup>

Because no electrophysiologic examination of the effects of propofol on mammalian central nervous system sodium channels in the absence of modifiers has been described, we investigated the actions of propofol on rat-brain sodium channels expressed in a mammalian cell line using the whole-cell patch-clamp technique in volt-

## SUPPRESSION OF CNS SODIUM CHANNELS BY PROPOFOL

age-clamp mode. The results were compared with previous studies, as well as with the actions of other intravenous and volatile anesthetics on sodium channel function.<sup>17</sup>

## Material and Methods

### Cell Culture

A stably transfected Chinese hamster ovary cell line (CNaIIA-1; gift from Dr. William Catterall, University of Washington, Seattle, WA), expressing the rat brain IIa sodium channel,<sup>18</sup> was used. The vector used for transfection contained a gene conferring resistance to the aminoglycoside antibiotic G418 (GIBCO, Grand Island, NY).

The cells were grown in RPMI 1640 medium (GIBCO) containing 10% fetal bovine serum and 1% penicillin/streptomycin mixture (GIBCO), as well as 200  $\mu\text{g/ml}$  G418 to select for transfected cells. Cells were cultured in 25  $\text{cm}^2$  polystyrene culture flasks (Corning, Corning, NY) at 37°C in room air containing 5%  $\text{CO}_2$ . For electrophysiologic recordings, cells were transferred to 60-mm Petri dishes (Becton Dickinson, Lincoln Park, NJ).

### Electrophysiology

Cells were used 2–4 days after transfer, before the cell layer became confluent. For electrophysiologic measurements, the culture medium was replaced by an extracellular solution containing 130 mM NaCl, 4 mM KCl, 1.5 mM  $\text{CaCl}_2$ , 1.5 mM  $\text{MgCl}_2$ , 5 mM glucose, and 5 mM HEPES, adjusted to pH 7.4 with CsOH.

Patch-clamp pipettes were pulled from micropipette glass (Drummond, Broomall, PA) and filled with an intracellular solution containing 10 mM NaCl, 90 mM CsF, 60 mM CsCl, and 6 mM HEPES, adjusted to pH 7.4 with CsOH. All solutions were filtered through 0.22- $\mu$  filters (Millipore, Bedford, MA) before use.

Sodium currents were studied using the whole-cell configuration of the patch-clamp recording technique,<sup>19</sup> using a standard patch-clamp amplifier (Axopatch 200, Axon Instruments, Foster City, CA) controlled by commercially available software (pCLAMP 5, Axon Instruments) on a standard personal computer. Currents were filtered at 5 kHz, digitized (at 50 kHz for the first 5 ms of each pulse, then 10 kHz), and recorded to hard disk. Capacitative transients and series resistance were measured and compensated using the internal compensation circuitry of the amplifier; active series resistance compensation was used to compensate for 60–70% of the

series resistance. Average series resistance before compensation was  $3.1 \pm 1.2 \text{ M}\Omega$  ( $n = 7$ ); average cell capacitance was  $19.2 \pm 11.0 \text{ pF}$  ( $n = 7$ ).

Cells with currents larger than 5 nA and smaller than 0.5 nA were excluded because of increasing series resistance error or possible contamination by small endogenous sodium currents in Chinese hamster ovary cells.<sup>18</sup> The average current of the seven cells included in this study was  $2.1 \pm 1.3 \text{ nA}$ . Recordings were made at room temperature (22–25°C).

2,6-Diisopropylphenol (Sigma, St. Louis, MO) was dissolved directly in the extracellular solution. Concentrations were calculated from the amount injected into the glass vials. The vials were vigorously vortexed for 2 min and sonicated in a bath sonicator for 30 min. The solution was filtered before use and applied *via* a glass-polytetrafluoroethylen perfusion system and a glass superfusion pipette (flow rate 0.5–0.8 ml/min) close to the cell. During the experiment, the anesthetic solution was continually perfused over the cell.

### Statistics

Curve fits were computed using a least-squares algorithm (Marquardt-Levenberg) of commercially available software (Sigmaplot, Jandel Scientific, Corte Madera, CA). Data are given  $\pm$  SD, unless noted otherwise.

## Results

### Suppression of Sodium Currents by Propofol

Sodium currents elicited by stepping the membrane potential from a holding value of  $-120 \text{ mV}$  to test potentials ranging from  $-60$  to  $+100 \text{ mV}$  (fig. 1A) were reversibly suppressed by propofol in a concentration-dependent manner (fig. 1B). Suppression occurred within seconds (the response time of the perfusion system). In contrast, currents reached only about 80% of control values after a 2-min washout. The voltage dependence of sodium current amplitude was unchanged by the anesthetic.

Maximum inward currents (minima of the current-voltage relations) were used to calculate current suppression, expressed as percentage of control. The data from all experiments ( $n = 7$ ) were averaged to establish a concentration-response plot (fig. 1C). Data are reported as percentage current suppression of the baseline value. Because sequences of increasing propofol concentrations with a washout only after 50 and 125  $\mu\text{M}$  propofol were used throughout the experiments, using the

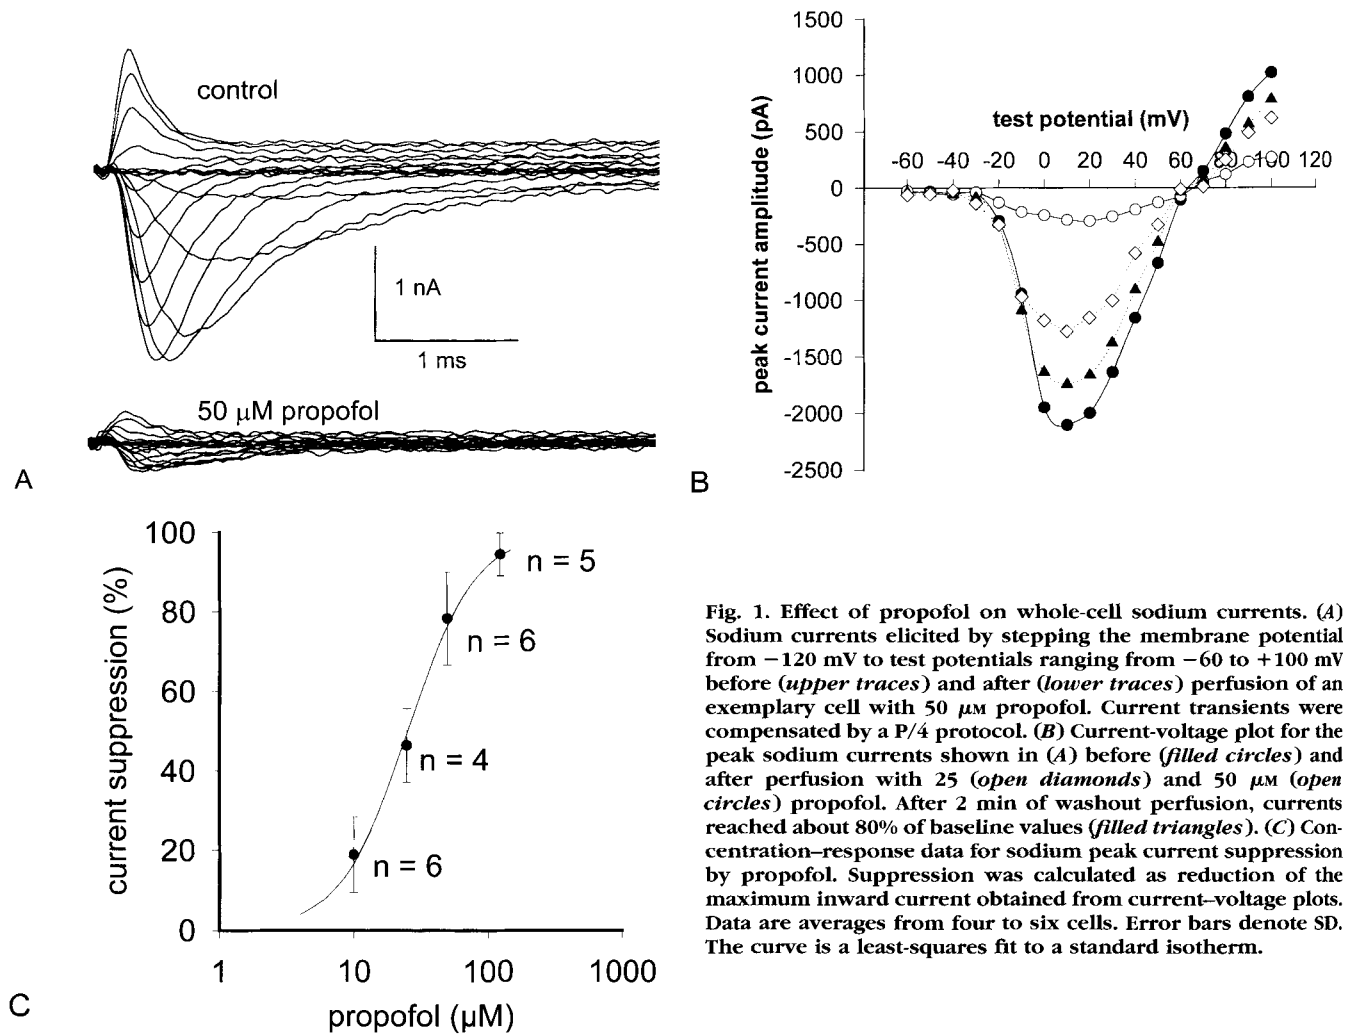

Fig. 1. Effect of propofol on whole-cell sodium currents. (A) Sodium currents elicited by stepping the membrane potential from  $-120$  mV to test potentials ranging from  $-60$  to  $+100$  mV before (upper traces) and after (lower traces) perfusion of an exemplary cell with  $50 \mu\text{M}$  propofol. Current transients were compensated by a P/4 protocol. (B) Current-voltage plot for the peak sodium currents shown in (A) before (filled circles) and after perfusion with  $25$  (open diamonds) and  $50 \mu\text{M}$  (open circles) propofol. After 2 min of washout perfusion, currents reached about 80% of baseline values (filled triangles). (C) Concentration-response data for sodium peak current suppression by propofol. Suppression was calculated as reduction of the maximum inward current obtained from current-voltage plots. Data are averages from four to six cells. Error bars denote SD. The curve is a least-squares fit to a standard isotherm.

average of baseline and washout will underestimate the effect of lower concentrations of propofol. Using only the baseline value, a sigmoid function for the concentration (c) dependence of inhibition  $I$  ( $I = 100 \cdot c^n / (IC_{50}^n + c^n)$ ) fit to the data yields an  $IC_{50}$  value (concentration yielding a half-maximal inhibitory effect) of  $25.4 \pm 1.1 \mu\text{M}$  ( $\pm$  SE of the fit), and a slope parameter (n) of  $1.7 \pm 0.1$ . For comparison, a fit to data calculated as percentage suppression of the average of baseline and washout values yielded an  $IC_{50}$  value of  $28.7 \pm 1.0 \mu\text{M}$ , and a slope parameter of  $1.9 \pm 0.1$ .

#### Effect of Propofol on Sodium-channel Steady-state Inactivation

Sodium-channel steady-state inactivation is a physiologically important property determining the availability of

the channels at various membrane potentials. Steady-state inactivation was assessed with a two-pulse protocol comprising a 500-ms prepulse to potentials ranging from  $-150$  to  $-10$  mV followed by a constant test pulse to  $-10$  mV. During the prepulse, a voltage-dependent equilibrium distribution (steady-state) is reached between resting and inactivated states of the channels, the latter being unavailable for opening during the subsequent test pulse.

Under control conditions, currents (shown for an exemplary cell in fig. 2A) decrease at prepulse potentials positive to about  $-80$  mV because of an increasing ratio of inactivated versus resting channels. Peak amplitudes of the currents can be plotted versus the prepulse potential to yield steady-state inactivation curves (fig. 2B).

The voltage dependence of the distribution between

## SUPPRESSION OF CNS SODIUM CHANNELS BY PROPOFOL

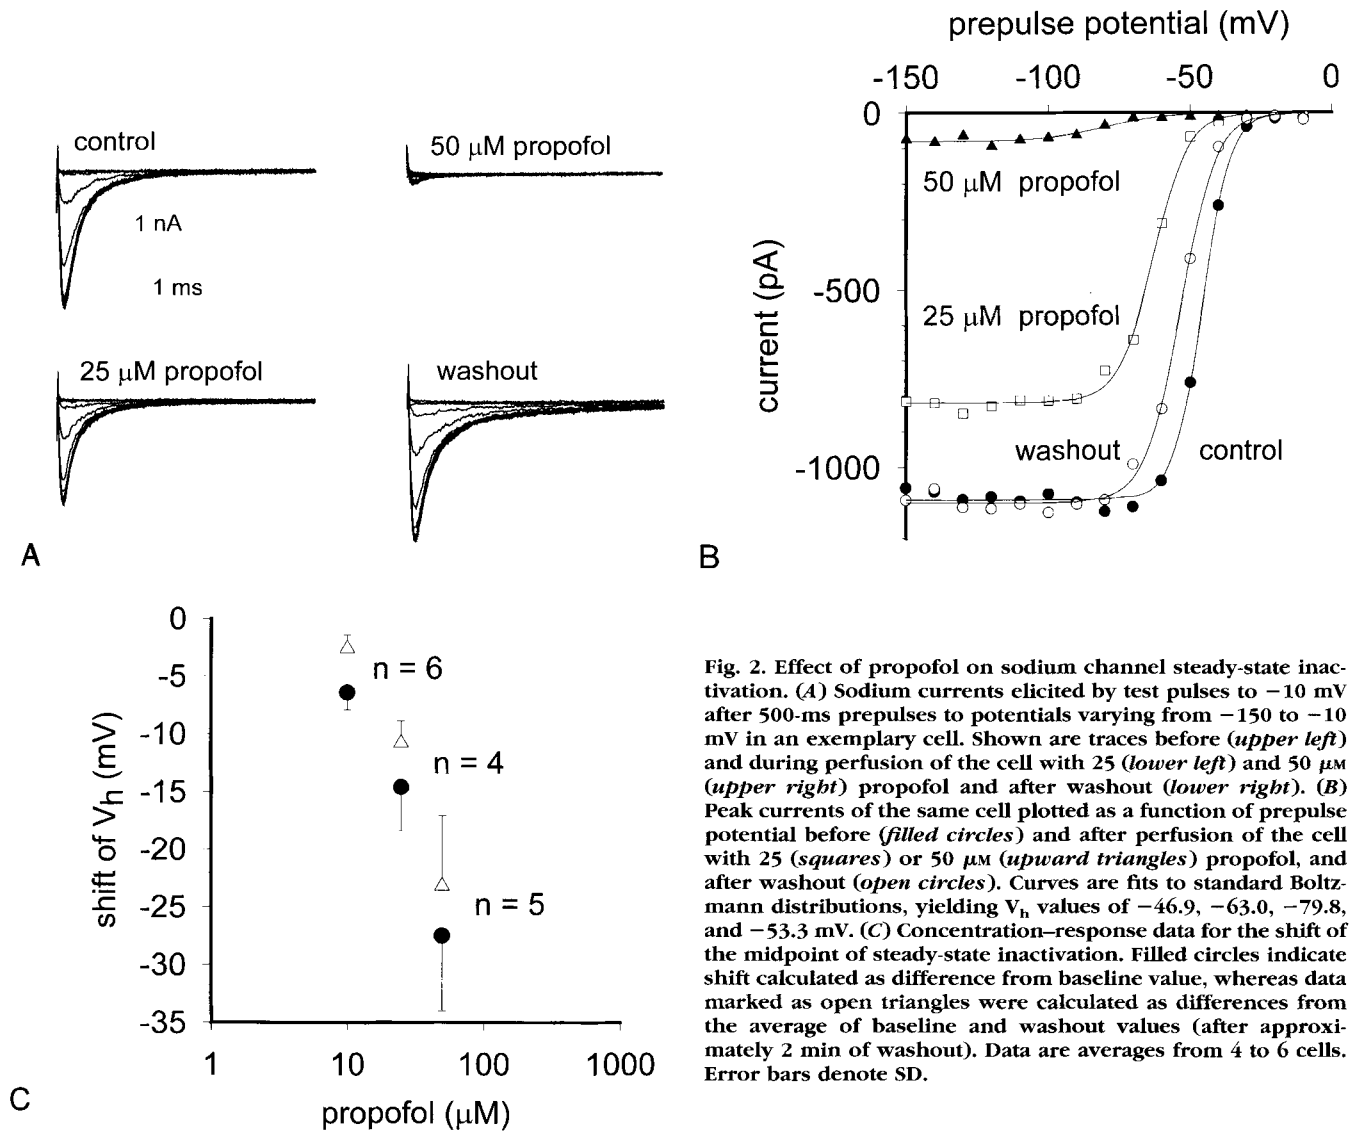

**Fig. 2.** Effect of propofol on sodium channel steady-state inactivation. (A) Sodium currents elicited by test pulses to  $-10$  mV after 500-ms prepulses to potentials varying from  $-150$  to  $-10$  mV in an exemplary cell. Shown are traces before (upper left) and during perfusion of the cell with 25 (lower left) and 50  $\mu$ M (upper right) propofol and after washout (lower right). (B) Peak currents of the same cell plotted as a function of prepulse potential before (filled circles) and after perfusion of the cell with 25 (squares) or 50  $\mu$ M (upward triangles) propofol, and after washout (open circles). Curves are fits to standard Boltzmann distributions, yielding  $V_h$  values of  $-46.9$ ,  $-63.0$ ,  $-79.8$ , and  $-53.3$  mV. (C) Concentration-response data for the shift of the midpoint of steady-state inactivation. Filled circles indicate shift calculated as difference from baseline value, whereas data marked as open triangles were calculated as differences from the average of baseline and washout values (after approximately 2 min of washout). Data are averages from 4 to 6 cells. Error bars denote SD.

inactivated and resting channels is described by a Boltzmann function:  $I(V) = I_{\max} - I_{\max} / \{1 + \exp[-z \cdot F \cdot (V - V_h) / RT]\}$ . This function is characterized by three parameters, with  $I_{\max}$  being the maximum current at hyperpolarized potentials (before any inactivation occurs),  $z$  the equivalent gating charge, and  $V_h$  the midpoint potential at which the function reaches its half-maximal value (control value for the seven cells was  $-54.0$  (5.8 mV);  $F$  is the Faraday constant,  $R$  the gas constant, and  $T$  the absolute temperature).

After application of propofol, currents were reduced at all potentials, as expected from the experiments described previously. Additionally, the voltage depen-

dence of steady-state inactivation was shifted in the hyperpolarizing (leftward) direction. This effect can be shown by plotting the shift in the midpoint potential  $V_h$  versus propofol concentration (fig 2C). At the highest concentration used (125  $\mu$ M), currents were too small for accurate determination of  $V_h$ . Therefore, it was not possible to determine whether this hyperpolarizing shift saturated.

The parameter  $z$  of the inactivation curve (equivalent gating charge) was reduced slightly by increasing propofol concentrations, from  $4.2 \pm 1.0$  before propofol application to  $3.8 \pm 0.9$  at 10  $\mu$ M,  $3.2 \pm 0.7$  at 25  $\mu$ M, and  $3.0 \pm 0.7$  at 50  $\mu$ M propofol.

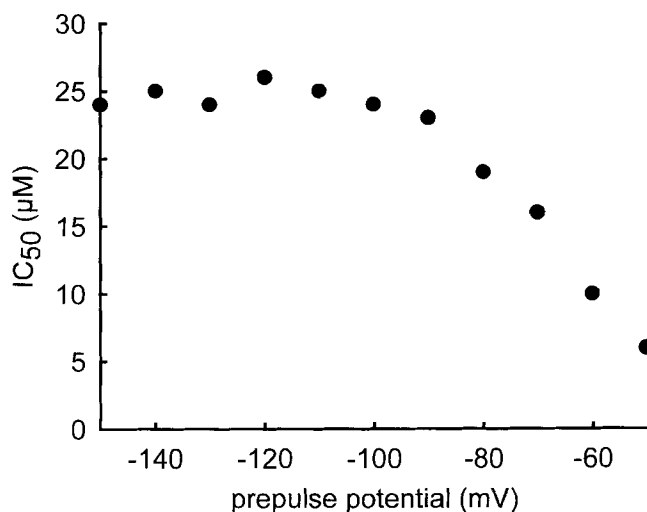

Fig. 3.  $IC_{50}$  of propofol plotted as a function of prepulse potential.  $IC_{50}$  values were calculated from currents elicited by a voltage step to  $-10$  mV from different prepulse potentials (same pulse protocol as in fig. 2, sigmoid functions with maximum effect fixed at 100% were fitted to data averaged from four to six cells for each concentration of propofol). Data at 10, 25, and 50  $\mu M$  propofol were used.

#### Voltage Dependence of Propofol Inhibition

The results of the above experiments reveal two effects of propofol on sodium currents: a voltage-independent current suppression observed alone at hyperpolarized prepulse potentials, and a hyperpolarizing shift of steady-state inactivation. This hyperpolarizing shift led to an additional voltage-dependent current reduction in the voltage range of channel inactivation (potentials more positive than  $-80$  mV). Thus, propofol potency is voltage-dependent. For quantification of this voltage dependence, the concentration-response curves at each potential were calculated from steady-state inactivation curves (fig. 2B). Plotting the  $IC_{50}$  values yielded by these calculations versus the prepulse potential demonstrates the increase in potency in the voltage range of sodium-channel inactivation (fig. 3). At  $-60$  mV, close to the action potential firing threshold of neuronal cells, the  $IC_{50}$  value is only  $10 \mu M$  (or  $14 \mu M$  when calculated as the suppression of the average of control and washout data), compared with about  $25$ – $30 \mu M$  at potentials negative to the voltage range of channel inactivation.

#### Use-dependent Inhibition by Propofol

Under physiologic conditions, action potentials and the opening of sodium channels rarely occur as single events but rather as trains of frequent stimuli. It has been shown for volatile anesthetics that a hyperpolarizing

shift in steady-state inactivation coincides with a slowed recovery of the channels from the inactivated state to the resting state.<sup>17</sup> This results in use-dependent block if the intervals between depolarizing pulses are too short to allow for complete recovery of channels from the inactivated state.

We assessed use-dependent block with trains of 20 depolarizations from  $-85$  to  $0$  mV applied at 5 Hz (pulse length 28.5 ms). Currents were reduced with concentration-dependent magnitudes and time constants (fig. 4A).

To further investigate the mechanism underlying this use-dependent block, we varied the pulse protocol in terms of pulse frequency (fig. 4B) and pulse duration (fig. 4C). A higher pulse frequency and a longer pulse duration both increased the time the channels spent in the inactive state, and both manipulations thus increased use-dependent block.

## Discussion

### Mechanisms of Propofol Suppression of Sodium Currents

In this study we demonstrated that propofol suppresses sodium currents mediated by voltage-activated neuronal sodium channels expressed in a mammalian cell line. Propofol suppressed sodium channels by at least two distinct mechanisms: a direct suppression of resting or open channels that was voltage-independent at hyperpolarized prepulse potentials, and an interaction with inactivated channels leading to a hyperpolarizing shift in sodium-channel inactivation and a voltage-dependent potency of propofol.  $IC_{50}$  values for propofol are therefore lower at depolarized potentials and reach  $10 \mu M$  in the range of the threshold potential of action potential firing (e.g., around  $-60$  mV).<sup>20</sup> These two mechanisms are qualitatively comparable to the effects of volatile anesthetics<sup>17</sup> and pentobarbital<sup>21</sup> on neuronal sodium channels. For these latter drugs, the effects were described in terms of a modulated receptor model, in which different channel states (for sodium channels at least three: resting, open, and inactivated) are assumed to have different affinities for drug binding.

In the present experiments, both the hyperpolarizing shift of steady-state inactivation and the use-dependent block can be explained by assuming that propofol binds more strongly to the inactivated state of the channel than to its resting state. The observation that use-dependent block is increased by increasing the time the channel spends in the inactivated state (longer depolarizations,

## SUPPRESSION OF CNS SODIUM CHANNELS BY PROPOFOL

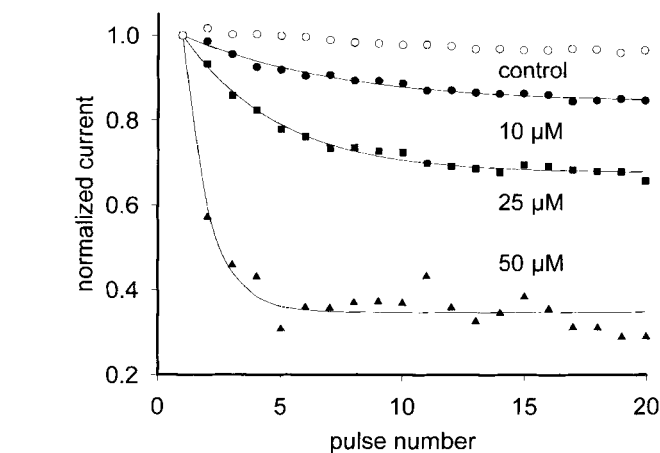

A

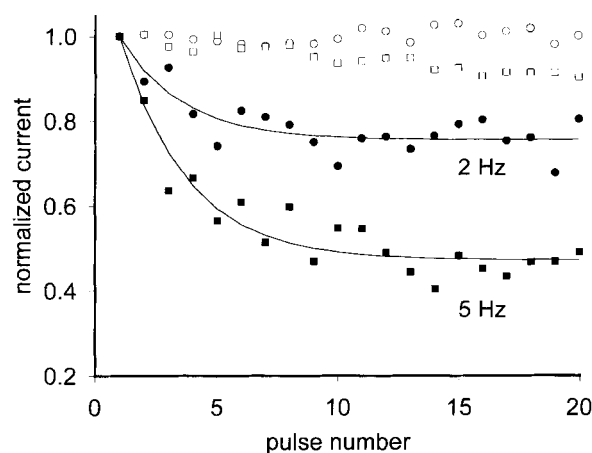

B

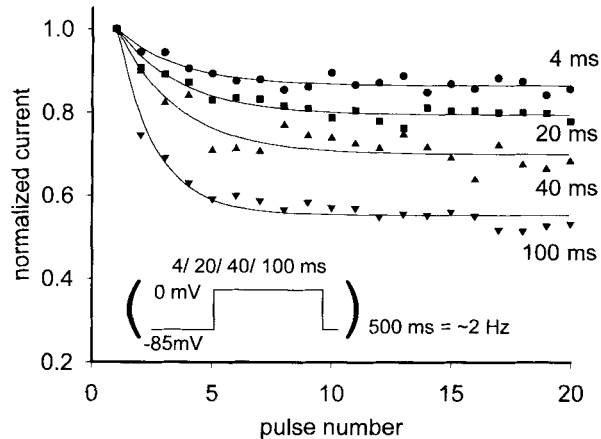

C

fig. 4C) is strong evidence that propofol alters the distribution between resting and inactivated channels.

One possible explanation for the qualitatively similar mechanisms of sodium current suppression by propofol, volatile anesthetics, and pentobarbital would be common or overlapping binding sites. This explanation is supported by the fact that quantitatively, sodium-channel suppression for all these drugs correlates well with the octanol-water partition coefficient (for propofol a value of 4300 was used<sup>22</sup>) in a double logarithmic representation (fig. 5). However, this correlation does not allow any inferences on whether the interaction between the drugs and the sodium channel is protein- or lipid-mediated. In contrast to these similarities, the concentration-response curve for the reduction of peak sodium current by propofol exhibits a slope parameter of 1.7, whereas the data for all volatile anesthetics and pentobarbital were well fitted with a slope parameter of

1.<sup>17,21</sup> Additional interactions may be involved in propofol action, which may also explain the incomplete wash-out of the propofol modification. The latter phenomenon may be caused by a slow washout of the lipophilic drug from the membrane, or related to irreversible effects of the drug on the cell.

**Comparison with Results from Previous Propofol Studies**

For this study we used rat brain IIa sodium channel  $\alpha$  subunits expressed in a stably transfected Chinese hamster ovary cell line to study the effects of propofol on brain sodium channels. The suitability of this preparation for these anesthetic studies has been discussed previously in detail.<sup>17</sup> Briefly, this preparation, despite the lack of  $\beta$  subunits, has been shown not to deviate from normal physiologic<sup>23</sup> and pharmacologic<sup>24</sup> behavior of sodium channels *in situ*. Moreover, the  $\beta_1$  subunit,

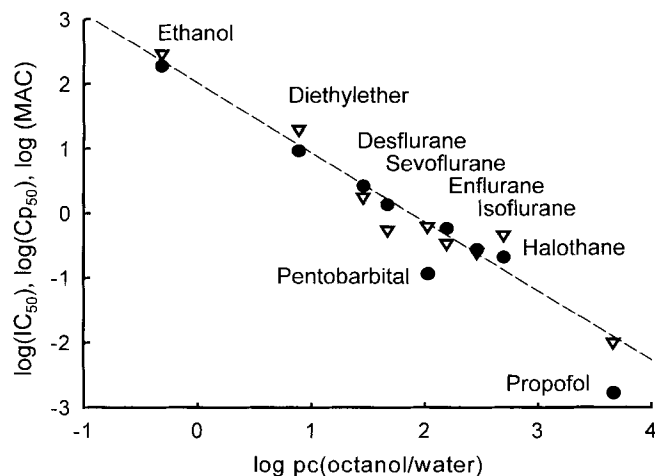

Fig. 5. Correlation of  $IC_{50}$  values for sodium-channel block at  $-60$  mV (open triangles) and clinical effect concentrations (human minimum alveolar concentration converted to aqueous concentrations or  $Cp_{50}$ , filled circles) with octanol-water partition coefficients for volatile anesthetics, pentobarbital, and propofol. The line is a linear regression fit to the data for sodium channel block with a slope of  $-1.08$ . Data for the volatile anesthetics and ethanol are from reference 17, and for pentobarbital from reference 21. Free propofol concentration at  $Cp_{50}$  was calculated as  $1.3 \mu\text{M}$ ,<sup>16</sup> and an octanol-water partition coefficient for propofol of 4300 was used.<sup>22</sup>

when coexpressed in this preparation, does not significantly shift channel inactivation.<sup>25</sup> The type IIa sodium channel is the most prominent subtype present in adult brain, and the rat brain IIa sodium-channel subtype has greater than 97% structural identity with the equivalent human-brain sodium channel.<sup>26</sup>

The effect of propofol on human-brain sodium channels has been studied previously in a lipid bilayer preparation.<sup>12</sup> In lipid bilayers, sodium-channel inactivation was removed by batrachotoxin, and therefore the propofol effect on channel inactivation could not be studied. However, the  $IC_{50}$  value for propofol obtained in the lipid bilayer preparation is comparable with what has been found in this study at hyperpolarized prepulse potentials (about  $25 \mu\text{M}$  at potentials negative to the voltage range of channel inactivation).

In the study of propofol effects on glutamate release, propofol inhibited sodium flux with an  $IC_{50}$  of about  $9 \mu\text{M}$ .<sup>13</sup> This concentration is similar to what we found at depolarized potentials ( $IC_{50}$  about  $10 \mu\text{M}$  at  $-60$  mV). Therefore our results agree with, and support, the conclusions of the previous studies using central nervous system sodium channels. Comparable qualitative and quantitative data have been reported for sodium currents in rat ventricular myocytes.<sup>27</sup> In con-

trast, for sodium currents in myelinated axons of *Xenopus laevis* a much higher  $IC_{50}$  value for propofol has been reported.<sup>28</sup> Similar differences in the sensitivity of peripheral nerve and central nervous system sodium channels have been previously found for volatile anesthetics.<sup>17</sup>

#### *Clinical Significance of Sodium Channel Suppression by Propofol*

In the present study we found that propofol blocked sodium-channel current with an  $IC_{50}$  of about  $10 \mu\text{M}$  in the range of the threshold potential of action potential firing (positive to  $-60$  mV). For propofol, the plasma concentration at which 50% of the patients do not respond to skin incision ( $Cp_{50}$ ) has been determined as  $85 \mu\text{M}$  in whole blood,<sup>29</sup> which corresponds to a free propofol concentration in plasma of  $1.3 \mu\text{M}$  (assuming protein-bound fraction of 98% and a plasma:whole blood concentration ratio of 0.78<sup>30</sup>). Thus the effects we observed occur at about eight-fold higher concentrations than the reported clinical propofol levels.

When comparing the propofol concentrations necessary to block sodium channels, however, several complicating factors must be considered. First, a concentration at which 50% inhibition occurs at the molecular level may not translate directly into a half-maximal effect at the tissue or organismal levels. For example, small reductions in sodium-channel conductance should result theoretically in substantial changes of action potential firing threshold.<sup>31</sup> This effect has been demonstrated for volatile anesthetics as a result of the hyperpolarizing shift in steady-state inactivation.<sup>32</sup> Second, the use-dependent block of sodium channels observed in our experiments should lead to anesthetic impairment of axonal conduction in regions with low safety factors for conduction (ratio of the current supplied by the incoming action potentials to that required to sustain propagation), such as neuronal bifurcations<sup>33</sup> or dendrites.<sup>34</sup> Finally, as mentioned previously, a recent study has demonstrated that propofol impairs release of glutamate in rat-brain synaptosomes by inhibition of sodium channels.<sup>13</sup> These effects occurred in the same concentration range as the sodium channel suppression found in this study.

#### *Comparison with Volatile Anesthetics and Pentobarbital*

As discussed previously, the clinical effect of propofol occurs at about eight-fold lower concentrations than a 50% sodium channel suppression at  $-60$  mV

## SUPPRESSION OF CNS SODIUM CHANNELS BY PROPOFOL

(IC<sub>50</sub> value of 10 μM). In contrast, for volatile anesthetics, sodium-channel suppression at neuronal threshold potentials has been shown to correlate well with clinical minimum alveolar concentrations.<sup>17</sup> Thus, minimum alveolar concentrations and IC<sub>50</sub> values for sodium-channel suppression at -60 mV for the volatile anesthetics are similar (fig. 5). Similar to propofol, however, another intravenous anesthetic, pentobarbital, inhibits sodium currents at concentrations about five-fold above clinical levels.

As discussed previously, all anesthetics examined cause qualitatively similar effects on sodium channels: a voltage-independent effect on open or resting sodium-channel states, and a shift in steady-state inactivation that results in a voltage-dependent block of sodium channels. All anesthetics, volatile and intravenous, have similar quantitative interactions with the closed or resting states, with IC<sub>50</sub>s for voltage-independent block about 5-10-fold above clinical levels.<sup>17,21</sup> However, volatile anesthetics cause a much greater shift in steady-state inactivation than either propofol or pentobarbital. For example, at IC<sub>50</sub> for the voltage-independent block, halothane caused about a -30-mV shift in inactivation and isoflurane about a -20-mV shift. In contrast, equivalent concentrations of propofol and pentobarbital caused only about a -5- to -8-mV shift. Therefore it is the change in the distribution between resting and inactive channels that appears to differ significantly between the volatile and intravenous anesthetics examined. Nonetheless, examination of the Meyer-Overton plot in figure 5 indicates that all of the anesthetics inhibit sodium channels at concentrations that correlate well with anesthetic hydrophobicity. Whereas for the volatile anesthetics clinical effects occur at the same concentrations, propofol and pentobarbital fall below this Meyer-Overton regression line.

One possible conclusion is that sodium-channel suppression is more important in anesthesia with volatile anesthetics than with propofol or pentobarbital, as these anesthetics may have more sensitive receptors. It needs to be considered, however, that plasma concentrations for intravenous anesthetics may not be identical to effect-site concentrations in the brain. It has been suggested that brain concentrations of propofol are actually about eight-fold higher than plasma concentrations,<sup>35</sup> corresponding to a brain: plasma partition coefficient of propofol of around 8,<sup>36</sup> and thus sodium-channel suppression may indeed have a role in propofol anesthesia.

The authors thank Y.-H. Xiao for her assistance with the cell culture and J.P. Dilger, H. C. Hemmings, Jr., L. Ratnakumari, and Dr. B.W. Urban for many helpful discussions.

## References

- Collins GG: Effects of the anaesthetic 2,6-diisopropylphenol on synaptic transmission in the rat olfactory cortex slice. *Br J Pharmacol* 1988; 95:939-49
- Concas A, Santoro G, Serra M, Sanna E, Biggio G: Neurochemical action of the general anaesthetic propofol on the chloride ion channel coupled with the GABA<sub>A</sub> receptors. *Brain Res* 1991; 542:225-32
- Peduto VA, Concas A, Santoro G, Biggio G, Gessa GL: Biochemical and electrophysiological evidence that propofol enhances GABAergic transmission in the rat brain. *ANESTHESIOLOGY* 1991; 75:1000-9
- Hales TG, Lambert JJ: The actions of propofol on inhibitory amino acid receptors of bovine adrenomedullary chromaffin cells and rodent central neurones. *Br J Pharmacol* 1991; 104:619-28
- Hara M, Kai Y, Ikemoto Y: Enhancement by propofol of the gamma-aminobutyric acid<sub>A</sub> response in dissociated hippocampal pyramidal neurons of the rat. *ANESTHESIOLOGY* 1994; 81:988-94
- Simpson VJ, Blednov Y: Propofol produces differences in behavior but not chloride channel function between selected lines of mice. *Anesth Analg* 1996; 82:327-31
- Yamakura T, Sakimura K, Shimoji K, Mishina M: Effects of propofol on various AMPA-, kainate-, and NMDA-selective glutamate receptor channels expressed in *Xenopus* oocytes. *Neurosci Lett* 1995; 188:187-90
- Orser BA, Bertlik M, Wang LY, MacDonald JF: Inhibition by propofol (2,6 di-isopropylphenol) of the N-methyl-D-aspartate subtype of glutamate receptor in cultured hippocampal neurones. *Br J Pharmacol* 1995; 116:1761-8
- Mascia MP, Mihic SJ, Valenzuela CF, Schofield PR, Harris RA: A single amino acid determines differences in ethanol actions on strychnine-sensitive glycine receptors. *Mol Pharmacol* 1996; 50:402-6
- Dilger JP, Vidal AM, Mody HI, Liu Y: Evidence for direct actions of general anesthetics on an ion channel protein: A new look at a unified mechanism of action. *ANESTHESIOLOGY* 1994; 81:431-42
- Barann M, Goethert M, Fink K, Boenisch H: Inhibition by anesthetics of <sup>14</sup>C-guanidinium flux through the voltage-gated sodium channel and the cation channel of the 5-HT<sub>3</sub> receptor of N1E-115 neuroblastoma cells. *Naunyn-Schmiedeberg's Arch-Pharmacol* 1993; 347:125-32
- Frenkel C, Urban BW: Human brain sodium channels as one of the molecular target sites for the new intravenous anaesthetic propofol (2,6-diisopropylphenol). *Eur J Pharmacol* 1991; 208:75-79
- Ratnakumari L, Hemmings HC: Effects of propofol on sodium channel-dependent sodium influx and glutamate release in rat cerebrocortical synaptosomes. *ANESTHESIOLOGY* 1997; 86:428-39
- Baum VC: Distinctive effects of three intravenous anesthetics on the inward rectifier (IK1) and the delayed rectifier (IK) potassium currents in myocardium: implications for the mechanisms of action. *Anesth Analg* 1993; 76:18-23
- Xuan Y-T, Glass PSA: Propofol regulation of calcium entry pathways in cultured A10 and rat aortic smooth muscle cells. *Br J Pharmacol* 1996; 117:5-12
- Ratnakumari L, Hemmings HC Jr: Inhibition by propofol of [<sup>3</sup>H]-batrachotoxinin-A 20-(benzoate) binding to voltage-dependent so-



- dium channels in rat cortical synaptosomes. *Br J Pharmacol* 1996; 119:1498-504
17. Rehberg B, Xiao Y-H, Duch DS: Central nervous system sodium channels are significantly suppressed at clinical concentrations of volatile anesthetics. *ANESTHESIOLOGY* 1996; 84:1223-33
  18. West JW, Scheuer T, Maechler L, WA Catterall: Efficient expression of rat brain type IIA Na<sup>+</sup> channel alpha subunits in a somatic cell line. *Neuron* 1992; 8:59-70
  19. Hamill OP, Marty A, Neher E, Sakmann B, Sigworth FJ: Improved patch-clamp techniques for high-resolution current recording from cells and cell-free membrane patches. *Pflügers Arch* 1981; 391:85-100
  20. Kandel ER, Schwartz JH, Jessell TM: Principles of Neural Science. New York, Elsevier, 1991, p. 110
  21. Rehberg B, Bennett E, Xiao YH, Levinson SR, Duch DS: Voltage- and frequency-dependent pentobarbital suppression of brain and muscle sodium channels expressed in a mammalian cell line. *Mol Pharmacol* 1995; 48:89-97
  22. Tonner PH, Poppers DM, Miller KW: The general anesthetic potency of propofol and its dependence on hydrostatic pressure. *ANESTHESIOLOGY* 1992; 77:926-931
  23. West JW, Scheuer T, Maechler L, WA Catterall: Efficient expression of rat brain type IIA Na<sup>+</sup> channel alpha subunits in a somatic cell line. *Neuron* 1992; 8:59-70
  24. Ragsdale DS, Scheuer T, Catterall, WA: Frequency and voltage-dependent inhibition of type IIA Na<sup>+</sup> channels, expressed in a mammalian cell line, by local anesthetic, antiarrhythmic, and anticonvulsant drugs. *Mol Pharmacol* 1991; 40:756-65
  25. Isom LI, Scheuer T, Brownstein AB, Ragsdale DA, Murphy BJ, Catterall WA: Functional co-expression of the  $\beta 1$  and type IIA  $\alpha$  subunits of sodium channels in a mammalian cell line. *J Biol Chem* 1995; 270:3306-12
  26. Ahmed CM, Ware DH, Lee SC, Patten CD, Ferrer-Montiel AV, Schinder AF, McPherson JD, Wagner-McPherson CB, Wasmuth JJ, Evans GA, Montal M: Primary structure, chromosomal localization, and functional expression of a voltage-gated sodium channel from human brain. *Proc Natl Acad Sci U S A* 1992; 89:8220-4
  27. Saint DA: The effects of propofol on macroscopic and single channel sodium currents in rat ventricular myocytes. *Br J Pharmacol* 1998; 124:655-62
  28. Veintemilla F, Elinder F, Arhem P: Mechanisms of propofol action on ion currents in the myelinated axon of *Xenopus laevis*. *Eur J Pharmacol* 1992; 218:59-68
  29. Smith C, McEwan AL, Jhaveri R, Wilkinson M, Goodman D, Smith R, Canada AT, Glass PSA: The interaction of fentanyl on the Cp<sub>50</sub> of propofol for loss of consciousness and skin incision. *ANESTHESIOLOGY* 1994; 81:820-8
  30. Servin F, Desmonts JM, Haberer JP, Cockshott ID, Plummer GF, Farinotti R: Pharmacokinetics and protein binding of propofol in patients with cirrhosis. *ANESTHESIOLOGY* 1988; 69:887-91
  31. Matzner O, Devor M: Na<sup>+</sup> conductance and the threshold for repetitive neuronal firing. *Brain Res* 1992; 597:92-8
  32. Butterworth JF, Raymond SA, Roscoe RF: Effects of halothane and enflurane on firing threshold of frog myelinated axons. *J Physiol* 1989; 411:493-516
  33. Grossman Y, Kendig JJ: General anesthetic block of a bifurcating axon. *Brain Res* 1982; 245:148-53
  34. Mackenzie PJ, Murphy TH: High safety factor for action potential conduction along axons but not dendrites of cultured hippocampal and cortical neurons. *J Neurophysiol* 1998; 80:2089-101
  35. Shyr M-H, Tsai T-H, Tan PPC, Chen C-F, Chan SHH: Concentration and regional distribution of propofol in brain and spinal cord during propofol anesthesia in the rat. *Neurosci Lett* 1995; 184:212-5
  36. Dutta S, Ebling WF: Formulation-dependent brain and lung distribution kinetics of propofol in rats. *ANESTHESIOLOGY* 1998; 89: 678-85
